# Supplementary material for: An iPSC-derived astrocyte model of fragile X syndrome exhibits dysregulated cholesterol homeostasis
Source: PubMed Central journal article supplement (PMC10387075; doi:10.1038/s42003-023-05147-9), 2023-07-29
Supplement: 42003_2023_5147_MOESM3_ESM.pdf [file 42003_2023_5147_MOESM3_ESM.pdf]

## Description of Additional Supplementary Files

**File name:** Supplementary Data

**Description:** The source data behind the graphs in the paper.
